# Supplementary material for: Adulteration of Weight Loss Supplements by the Illegal Addition of Synthetic Pharmaceuticals
Source: MDPI journal article supplement (doi:10.3390/molecules26226903), 2021-11-16
Supplement: s1 [file s1]

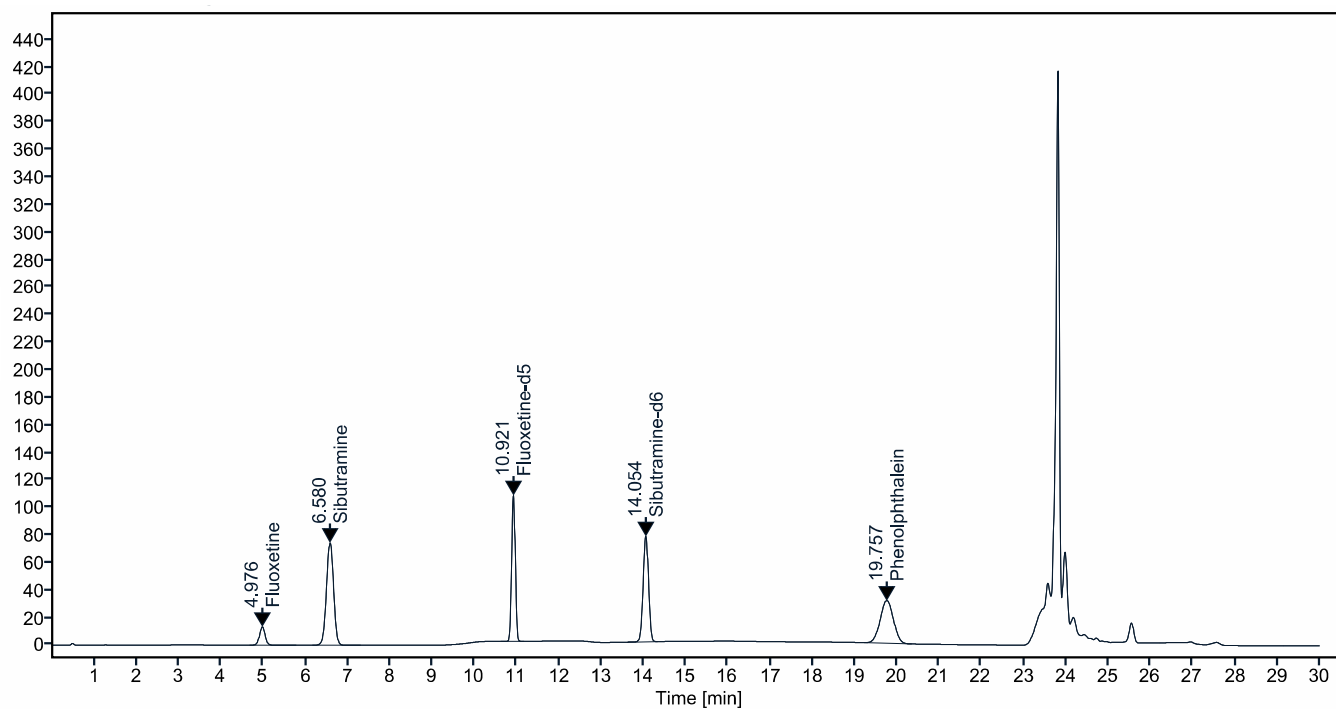

| Name            | RT (min) | Area      |
|-----------------|----------|-----------|
| Fluoxetine      | 4.976    | 123.636   |
| Sibutramine     | 6.580    | 877.825   |
| Fluoxetine-d5   | 10.921   | 637.695   |
| Sibutramine-d6  | 14.054   | 687.799   |
| Phenolphthalein | 19.757   | 679.323   |
| Sum             |          | 3006.2784 |

Figure S1. The chromatograms for some analyzed weight loss supplements.
